# Supplementary material for: Peripheral opioid receptor antagonism alleviates fentanyl-induced cardiorespiratory depression and is devoid of aversive behavior
Source: eLife. 2025 Apr 1;13:RP104469. doi: 10.7554/eLife.104469 (PMC11961120; doi:10.7554/eLife.104469)
Supplement: Figure 1—source data 1. [file elife-104469-fig1-data1.xlsx]

## Sheet: Figure 1
Panel	Data Analyzed	Primary Analysis	n	Post-Hoc Analysis	Comparison	P value	Statistic (DF)
Fig 1E	O2 saturation Nadir	one-way ANOVA	46		between groups	<0.0001		F (3, 42) = 186.3
				Tukey's multiple comparisons test	20 ug/kg vs. 50 ug/kg	<0.0001
					20 ug/kg vs. 2 ug/kg	<0.0001
					20 ug/kg vs. Saline	<0.0001
					50 ug/kg vs. 2 ug/kg	<0.0001				Statistical Source Data for Figure 1
					50 ug/kg vs. Saline	<0.0001
					2 ug/kg vs. Saline	0.9983
Fig 1F	O2 saturation 90%BL	one-way ANOVA	46		between groups	<0.0001		F (3, 42) = 28.72
				Tukey's multiple comparisons test	20 ug/kg vs. 50 ug/kg	<0.0001
					20 ug/kg vs. 2 ug/kg	0.0251
					20 ug/kg vs. Saline	0.0361
					50 ug/kg vs. 2 ug/kg	<0.0001
					50 ug/kg vs. Saline	<0.0001
					2 ug/kg vs. Saline	>0.9999
Fig 1G	HR Nadir	one-way ANOVA	46		between groups	<0.0001		F (3, 42) = 74.90
				Tukey's multiple comparisons test	20 ug/kg vs. 50 ug/kg	0.8927
					20 ug/kg vs. 2 ug/kg	<0.0001
					20 ug/kg vs. Saline	<0.0001
					50 ug/kg vs. 2 ug/kg	<0.0001
					50 ug/kg vs. Saline	<0.0001
					2 ug/kg vs. Saline	0.1935
Fig 1H	HR 90%BL	one-way ANOVA	46		between groups	<0.0001		F (3, 42) = 23.89
				Tukey's multiple comparisons test	20 ug/kg vs. 50 ug/kg	0.0003
					20 ug/kg vs. 2 ug/kg	0.0094
					20 ug/kg vs. Saline	0.0117
					50 ug/kg vs. 2 ug/kg	<0.0001
					50 ug/kg vs. Saline	<0.0001
					2 ug/kg vs. Saline	0.9991
Fig 1I	RR Nadir	one-way ANOVA	46		between groups	<0.0001		F (3, 42) = 45.35
				Tukey's multiple comparisons test	20 ug/kg vs. 50 ug/kg	0.0196
					20 ug/kg vs. 2 ug/kg	<0.0001
					20 ug/kg vs. Saline	<0.0001
					50 ug/kg vs. 2 ug/kg	<0.0001
					50 ug/kg vs. Saline	<0.0001
					2 ug/kg vs. Saline	0.8804
Fig 1J	RR 90%BL	one-way ANOVA	46		between groups	<0.0001		F (3, 42) = 16.53
				Tukey's multiple comparisons test	20 ug/kg vs. 50 ug/kg	0.0041
					20 ug/kg vs. 2 ug/kg	0.0379
					20 ug/kg vs. Saline	0.0341
					50 ug/kg vs. 2 ug/kg	<0.0001
					50 ug/kg vs. Saline	<0.0001
					2 ug/kg vs. Saline	0.9964
Fig 1L	#Fos cells	one-way ANOVA	31		between groups	<0.0001		F (3, 27) = 37.13
				Tukey's multiple comparisons test	Saline vs. 2 μg/kg	0.0447
					Saline vs. 20 μg/kg	0.0122
					Saline vs. 50 μg/kg	0.0003
					2 μg/kg vs. 20 μg/kg	0.1564
					2 μg/kg vs. 50 μg/kg	0.004
					20 μg/kg vs. 50 μg/kg	0.4871
Fig 1M	%TH cells expressing Fos-IR	one-way ANOVA	31		between groups	<0.0001		F (3, 27) = 35.42
				Tukey's multiple comparisons test	Saline vs. 2 ug/kg	<0.0001
					Saline vs. 20ug/kg	<0.0001
					Saline vs. 50 ug/kg	<0.0001
					2 ug/kg vs. 20ug/kg	0.1898
					2 ug/kg vs. 50 ug/kg	0.0014
					20ug/kg vs. 50 ug/kg	0.1032
