# Supplementary material for: Peripheral opioid receptor antagonism alleviates fentanyl-induced cardiorespiratory depression and is devoid of aversive behavior
Source: eLife. 2025 Apr 1;13:RP104469. doi: 10.7554/eLife.104469 (PMC11961120; doi:10.7554/eLife.104469)
Supplement: Figure 2—figure supplement 1—source data 1. [file elife-104469-fig2-figsupp1-data1.xlsx]

## Sheet: Figure 2-Figure Supplement 1
Panel	Data Analyzed	Primary Analysis	n	Post-Hoc Analysis	Comparison	P value	Statistic (DF)
Figure 2 - Figure Supplement 1	O2 saturation Nadir	one-way ANOVA	30		between groups	P=0.8617		F (2, 27) = 0.1497
				Tukey's multiple comparisons test	NLX vs. 1mg NLXM	0.8957				Figure 2-Figure Supplement 1
					NLX vs. 5mg NLXM	0.8741
					1 mg NLXM vs. 5 mg NLXM	0.9997
Figure 2 - Figure Supplement 1	O2 saturation 90%BL	one-way ANOVA	30		between groups	P=0.3811		F (2, 27) = 1.000
				Tukey's multiple comparisons test	NLX vs. 1mg NLXM	0.468
					NLX vs. 5mg NLXM	0.433
					1 mg NLXM vs. 5 mg NLXM	>0.9999
Figure 2 - Figure Supplement 1	Heart Rate Nadir	one-way ANOVA	30		between groups	P=0.1402		F (2, 27) = 2.115
				Tukey's multiple comparisons test	NLX vs. 1mg NLXM	0.9894
					NLX vs. 5mg NLXM	0.2198
					1 mg NLXM vs. 5 mg NLXM	0.1872
Figure 2 - Figure Supplement 1	Heart Rate 90%BL	one-way ANOVA	30		between groups	P=0.5047		F (2, 27) = 0.7014
				Tukey's multiple comparisons test	NLX vs. 1mg NLXM	0.8416
					NLX vs. 5mg NLXM	0.8078
					1 mg NLXM vs. 5 mg NLXM	0.4743
Figure 2 - Figure Supplement 1	Respiratory Rate Nadir	one-way ANOVA	30		between groups	P=0.2211		F (2, 27) = 1.597
				Tukey's multiple comparisons test	NLX vs. 1mg NLXM	0.984
					NLX vs. 5mg NLXM	0.2516
					1 mg NLXM vs. 5 mg NLXM	0.3513
Figure 2 - Figure Supplement 1	Respiratory Rate 90%BL	one-way ANOVA	30		between groups	P=0.3121		F (2, 27) = 1.216
				Tukey's multiple comparisons test	NLX vs. 1mg NLXM	0.692
					NLX vs. 5mg NLXM	0.2806
					1 mg NLXM vs. 5 mg NLXM	0.7808
