# Supplementary material for: Peripheral opioid receptor antagonism alleviates fentanyl-induced cardiorespiratory depression and is devoid of aversive behavior
Source: eLife. 2025 Apr 1;13:RP104469. doi: 10.7554/eLife.104469 (PMC11961120; doi:10.7554/eLife.104469)
Supplement: Figure 2—source data 1. [file elife-104469-fig2-data1.xlsx]

## Sheet: Figure 2
Panel	Data Analyzed	Primary Analysis	n	Post-Hoc Analysis	Comparison	P value	Statistic (DF)
Fig 2B	Biodistribution - 1 mg/kg NLXM	Ordinary one-way ANOVA	25		between groups	P<0.0001		F (3, 21) = 125.6
				Tukey's multiple comparisons test	NLXM 2' plasma vs. NLXM 10' plasma	<0.0001				Statistical Source Data for Figure 2
					NLXM 2' plasma vs. NLXM 2' brain	<0.0001
					NLXM 2' plasma vs. NLXM 10' brain	<0.0001
					NLXM 10' plasma vs. NLXM 2' brain	0.0967
					NLXM 10' plasma vs. NLXM 10' brain	0.0352
					NLXM 2' plasma vs. NLXM 10' brain	0.9976
Fig 2C	Biodistribution - 5 mg/kg NLXM	Ordinary one-way ANOVA	22		between groups	P<0.0001		F (3, 18) = 144.0
				Tukey's multiple comparisons test	NLXM 2' plasma vs. NLXM 10' plasma	<0.0001
					NLXM 2' plasma vs. NLXM 2' brain	<0.0001
					NLXM 2' plasma vs. NLXM 10' brain	<0.0001
					NLXM 10' plasma vs. NLXM 2' brain	0.0003
					NLXM 10' plasma vs. NLXM 10' brain	0.0001
					NLXM 2' plasma vs. NLXM 10' brain	0.9753
Fig 2D	Biodistribution - 1 mg/kg NLX	Ordinary one-way ANOVA	25		between groups	P<0.0001		F (3, 21) = 66.05
				Tukey's multiple comparisons test	NLX 2' plasma vs. NLX 10' plasma	0.0017
					NLX 2' plasma vs. NLX 2' brain	<0.0001
					NLX 2' plasma vs. NLX 10' brain	0.9803
					NLX 10' plasma vs. NLX 2' brain	<0.0001
					NLX 10' plasma vs. NLX 10' brain	0.0067
					NLX 2' plasma vs. NLX 10' brain	<0.0001
