# Supplementary material for: Peripheral opioid receptor antagonism alleviates fentanyl-induced cardiorespiratory depression and is devoid of aversive behavior
Source: eLife. 2025 Apr 1;13:RP104469. doi: 10.7554/eLife.104469 (PMC11961120; doi:10.7554/eLife.104469)
Supplement: Figure 3—figure supplement 1—source data 1. [file elife-104469-fig3-figsupp1-data1.xlsx]

## Sheet: Figure 3 - Figure Supplement 1
Panel	Data Analyzed	Primary Analysis	n	Post-Hoc Analysis	Comparison	P value	Statistic (DF)
Figure 3 - Figure Supplement 1	O2 saturation Nadir	one-way ANOVA	35		between groups	P<0.0001		F (3, 31) = 58.04
				Tukey's multiple comparisons test	Saline vs. 1MG NLXM	0.0129
					Saline vs. NLX	<0.0001				Figure 3 - Figure Supplement 1
					Saline vs. 5mg NLXM	<0.0001
					1MG NLXM vs. NLX	<0.0001
					1MG NLXM vs. 5mg NLXM	<0.0001
					NLX vs. 5mg NLXM	0.0016
Figure 3 - Figure Supplement 1	O2 saturation 90%BL	one-way ANOVA	35		between groups	P<0.0001		F (3, 31) = 23.00
				Tukey's multiple comparisons test	Saline vs. 1MG NLXM	0.016
					Saline vs. NLX	<0.0001
					Saline vs. 5mg NLXM	<0.0001
					1MG NLXM vs. NLX	0.0001
					1MG NLXM vs. 5mg NLXM	0.0004
					NLX vs. 5mg NLXM	0.6552
Figure 3 - Figure Supplement 1	HR Nadir	one-way ANOVA	35		between groups	P<0.0001		F (3, 31) = 46.34
				Tukey's multiple comparisons test	Saline vs. 1MG NLXM	0.0498
					Saline vs. NLX	<0.0001
					Saline vs. 5mg NLXM	<0.0001
					1MG NLXM vs. NLX	<0.0001
					1MG NLXM vs. 5mg NLXM	<0.0001
					NLX vs. 5mg NLXM	0.7638
Figure 3 - Figure Supplement 1	HR 90%BL	one-way ANOVA	35		between groups	P<0.0001		F (3, 31) = 21.13
				Tukey's multiple comparisons test	Saline vs. 1MG NLXM	0.0016
					Saline vs. NLX	<0.0001
					Saline vs. 5mg NLXM	<0.0001
					1MG NLXM vs. NLX	0.0025
					1MG NLXM vs. 5mg NLXM	0.0052
					NLX vs. 5mg NLXM	0.7691
Figure 3 - Figure Supplement 1	RR Nadir	one-way ANOVA	35		between groups	P<0.0001		F (3, 31) = 11.12
				Tukey's multiple comparisons test	Saline vs. 1MG NLXM	0.6875
					Saline vs. NLX	<0.0001
					Saline vs. 5mg NLXM	0.0004
					1MG NLXM vs. NLX	0.0003
					1MG NLXM vs. 5mg NLXM	0.0016
					NLX vs. 5mg NLXM	0.5321
Figure 3 - Figure Supplement 1	RR 90%BL	one-way ANOVA	35		between groups	P<0.0001		F (3, 31) = 12.79
				Tukey's multiple comparisons test	Saline vs. 1MG NLXM	0.0026
					Saline vs. NLX	<0.0001
					Saline vs. 5mg NLXM	<0.0001
					1MG NLXM vs. NLX	0.0463
					1MG NLXM vs. 5mg NLXM	0.0858
					NLX vs. 5mg NLXM	0.7581
Figure 3 - Figure Supplement 1	#Fos cells	one-way ANOVA	20		between groups	P=0.0003		F (3, 16) = 11.40
				Tukey's multiple comparisons test	NLX vs. 1 mg NLXM	0.0004
					NLX vs. Saline	0.0005
					NLX vs. 5 mg NLXM	0.0166
					1 mg NLXM vs. Saline	0.9999
					1 mg NLXM vs. 5 mg NLXM	0.3053
					Saline vs. 5mg NLXM	0.3121
Figure 3 - Figure Supplement 1	%TH cells expressing Fos-IR	one-way ANOVA	20		between groups	P=0.0001		F (3, 16) = 13.06
				Tukey's multiple comparisons test	NLX vs. 1 mg NLXM	0.0002
					NLX vs. Saline	0.0003
					NLX vs. 5 mg NLXM	0.0187
					1 mg NLXM vs. Saline	0.9994
					1 mg NLXM vs. 5 mg NLXM	0.1362
					Saline vs. 5mg NLXM	0.1933
