# Supplementary material for: Peripheral opioid receptor antagonism alleviates fentanyl-induced cardiorespiratory depression and is devoid of aversive behavior
Source: eLife. 2025 Apr 1;13:RP104469. doi: 10.7554/eLife.104469 (PMC11961120; doi:10.7554/eLife.104469)
Supplement: Figure 3—source data 1. [file elife-104469-fig3-data1.xlsx]

## Sheet: Figure 3
Panel	Data Analyzed	Primary Analysis	n	Post-Hoc Analysis	Comparison	P value	Statistic (DF)
Fig 3E	O2 saturation Nadir	one-way ANOVA	33		between groups	<0.0001		F (2, 30) = 152.0
				Tukey's multiple comparisons test	Sal vs. NLXM	<0.0001				Statistical Source Data for Figure 3
					Sal vs. NLX	<0.0001
					NLXM vs. NLX	0.2292
Fig 3F	O2 saturation 90%BL	one-way ANOVA	33		between groups	<0.0001		F (2, 30) = 81.90
				Tukey's multiple comparisons test	Sal vs. NLXM	<0.0001
					Sal vs. NLX	<0.0001
					NLXM vs. NLX	0.6913
Fig 3G	HR Nadir	one-way ANOVA	33		between groups	<0.0001		F (2, 30) = 38.58
				Tukey's multiple comparisons test	Sal vs. NLXM	<0.0001
					Sal vs. NLX	<0.0001
					NLXM vs. NLX	0.6457
Fig 3H	HR 90%BL	one-way ANOVA	33		between groups	<0.0001		F (2, 30) = 44.11
				Tukey's multiple comparisons test	Sal vs. NLXM	<0.0001
					Sal vs. NLX	<0.0001
					NLXM vs. NLX	0.9956
Fig 3I	RR Nadir	one-way ANOVA	33		between groups	<0.0001		F (2, 30) = 20.16
				Tukey's multiple comparisons test	Sal vs. NLXM	<0.0001
					Sal vs. NLX	<0.0001
					NLXM vs. NLX	0.9015
Fig 3J	RR 90%BL	one-way ANOVA	33		between groups	<0.0001		F (2, 30) = 46.74
				Tukey's multiple comparisons test	Sal vs. NLXM	<0.0001
					Sal vs. NLX	<0.0001
					NLXM vs. NLX	0.9996
Fig 3L	#Fos cells	one-way ANOVA	21		between groups	<0.0001		F (2, 18) = 30.52
				Tukey's multiple comparisons test	Sal vs. NLXM	0.1297
					Sal vs. NLX	<0.0001
					NLXM vs. NLX	<0.0001
Fig 3M	%TH cells expressing Fos-IR	one-way ANOVA	21		between groups	<0.0001		F (2, 18) = 21.33
				Tukey's multiple comparisons test	Sal vs. NLXM	0.9947
					Sal vs. NLX	0.0002
					NLXM vs. NLX	<0.0001

## Sheet: Sheet1
					Cohort 3							Change from BL
			JB16	M	saline ip	350	360	360				10
			JB17	F	saline ip	280	280	300				20
			JB18	M	fentanyl ip	340	320	320				-20
			JB19	F	fentanyl ip	260	260	270				10
			JB20	M	morph ip	350	340	330				-20
			JB21	F	morph ip	270	260	260				-10
			JB22	M	oxy ip	350	340	340				-10
			JB23	F	oxy ip	250	250	260				10
			Cohort 2			Dose 1	Dose 2	Dose 3	Dose 4	Fent		Change from BL
			JB8	M	saline iv	300	310	322	330	330		30
			JB9	F	saline iv	250	260	270	280	270		20
			JB10	M	fentanyl iv	330	330	330	340	340		10
			JB11	F	fentanyl iv	230	240	240	240	250		20
			JB12	M	morphine ip	320	320	320	310	310		-10
			JB13	F	morphine ip	260	260	260	260	280		20
			JB14	M	oxy ip	330	330	330	320	330		0
			JB15	F	oxy ip	240	240	240	240	250		10
