# Supplementary material for: Peripheral opioid receptor antagonism alleviates fentanyl-induced cardiorespiratory depression and is devoid of aversive behavior
Source: eLife. 2025 Apr 1;13:RP104469. doi: 10.7554/eLife.104469 (PMC11961120; doi:10.7554/eLife.104469)
Supplement: Figure 4—figure supplement 1—source data 1. [file elife-104469-fig4-figsupp1-data1.xlsx]

## Sheet: Figure 4 - Figure Supplement 1
Panel	Data Analyzed	Primary Analysis	n	Post-Hoc Analysis	Comparison	P value	Statistic (DF)
Figure 4 - Figure Supplement 1	O2 saturation Nadir	one way ANOVA	33		between groups	P=0.8325		F (3, 29) = 0.2897
				Tukey's multiple comparisons test	Saline vs. 1MG NLXM	0.3598				Figure 4 - Figure Supplement 1
					Saline vs. NLX	0.6235
					Saline vs. 5mg NLXM	0.6711
					1MG NLXM vs. NLX	0.6872
					1MG NLXM vs. 5mg NLXM	0.6621
					NLX vs. 5mg NLXM	0.9619
Figure 4 - Figure Supplement 1	O2 saturation 90%BL	one way ANOVA	33		between groups	P<0.0001		F (3, 29) = 18.25
				Tukey's multiple comparisons test	Saline vs. 1MG NLXM	0.0002
					Saline vs. NLX	<0.0001
					Saline vs. 5mg NLXM	<0.0001
					1MG NLXM vs. NLX	0.0307
					1MG NLXM vs. 5mg NLXM	0.0431
					NLX vs. 5mg NLXM	0.9429
Figure 4 - Figure Supplement 1	HR Nadir	one way ANOVA	33		between groups	P=0.9612		F (3, 29) = 0.09684
				Tukey's multiple comparisons test	Saline vs. 1MG NLXM	0.6641
					Saline vs. NLX	0.9782
					Saline vs. 5mg NLXM	0.7963
					1MG NLXM vs. NLX	0.6538
					1MG NLXM vs. 5mg NLXM	0.8818
					NLX vs. 5mg NLXM	0.7819
Figure 4 - Figure Supplement 1	HR 90%BL	one way ANOVA	33		between groups	P=0.0001		F (3, 29) = 9.705
				Tukey's multiple comparisons test	Saline vs. 1MG NLXM	0.2766
					Saline vs. NLX	0.0002
					Saline vs. 5mg NLXM	0.0002
					1MG NLXM vs. NLX	0.003
					1MG NLXM vs. 5mg NLXM	0.0036
					NLX vs. 5mg NLXM	0.9615
Figure 4 - Figure Supplement 1	RR Nadir	one way ANOVA	33		between groups	P=0.9325		F (3, 29) = 0.1443
				Tukey's multiple comparisons test	Saline vs. 1MG NLXM	0.6059
					Saline vs. NLX	0.6694
					Saline vs. 5mg NLXM	0.5606
					1MG NLXM vs. NLX	0.941
					1MG NLXM vs. 5mg NLXM	0.9204
					NLX vs. 5mg NLXM	0.8675
Figure 4 - Figure Supplement 1	RR 90%BL	one way ANOVA	33		between groups	P=0.0078		F (3, 29) = 4.799
				Tukey's multiple comparisons test	Saline vs. 1MG NLXM	0.1935
					Saline vs. NLX	0.0035
					Saline vs. 5mg NLXM	0.0041
					1MG NLXM vs. NLX	0.0695
					1MG NLXM vs. 5mg NLXM	0.0716
					NLX vs. 5mg NLXM	0.9592
Figure 4 - Figure Supplement 1	#Fos cells	one way ANOVA	19		between groups	P=0.8468		F (3, 15) = 0.2689
				Tukey's multiple comparisons test	1MG NLXM vs. NLX	0.9138
					Saline vs. NLX	0.9903
					NLX vs. 5mg NLXM	0.8503
					Saline vs. 1MG NLXM	0.984
					1MG NLXM vs. 5mg NLXM	0.9989
					Saline vs. 5mg NLXM	0.9564
Figure 4 - Figure Supplement 1	%TH cells expressing Fos-IR	one way ANOVA	19		between groups	P=0.5330		F (3, 15) = 0.7616
				Tukey's multiple comparisons test	1MG NLXM vs. NLX	0.9621
					Saline vs. NLX	0.6132
					NLX vs. 5mg NLXM	0.5949
					Saline vs. 1MG NLXM	0.9121
					1MG NLXM vs. 5mg NLXM	0.8877
					Saline vs. 5mg NLXM	0.9996
