# Supplementary material for: Peripheral opioid receptor antagonism alleviates fentanyl-induced cardiorespiratory depression and is devoid of aversive behavior
Source: eLife. 2025 Apr 1;13:RP104469. doi: 10.7554/eLife.104469 (PMC11961120; doi:10.7554/eLife.104469)
Supplement: Figure 4—source data 1. [file elife-104469-fig4-data1.xlsx]

## Sheet: Figure 4
Panel	Data Analyzed	Primary Analysis	n	Post-Hoc Analysis	Comparison	P value	Statistic (DF)
Fig 4E	O2 saturation Nadir	one-way ANOVA	30		between groups	P=0.7494		F (2, 27) = 0.2916
				Tukey's multiple comparisons test	Sal vs. NLXM	0.7559				Statistical Source Data for Figure 4
					Sal vs. NLX	0.986
					NLXM vs. NLX	0.8496
Fig 4F	O2 saturation 90%BL	one-way ANOVA	30		between groups	<0.0001		F (2, 27) = 22.58
				Tukey's multiple comparisons test	Sal vs. NLXM	<0.0001
					Sal vs. NLX	<0.0001
					NLXM vs. NLX	0.5434
Fig 4G	HR Nadir	one-way ANOVA	30		between groups	P=0.6602		F (2, 27) = 0.4216
				Tukey's multiple comparisons test	Sal vs. NLXM	0.7428
					Sal vs. NLX	0.6722
					NLXM vs. NLX	0.9831
Fig 4H	HR 90%BL	one-way ANOVA	30		between groups	<0.0001		F (2, 27) = 19.39
				Tukey's multiple comparisons test	Sal vs. NLXM	0.0003
					Sal vs. NLX	<0.0001
					NLXM vs. NLX	0.148
Fig 4I	RR Nadir	one-way ANOVA	30		between groups	P=0.0180		F (2, 27) = 4.679
				Tukey's multiple comparisons test	Sal vs. NLXM	0.0142
					Sal vs. NLX	0.1422
					NLXM vs. NLX	0.6205
Fig 4J	RR 90%BL	one-way ANOVA	30		between groups	P=0.0056		F (2, 27) = 6.322
				Tukey's multiple comparisons test	Sal vs. NLXM	0.0343
					Sal vs. NLX	0.0055
					NLXM vs. NLX	0.5798
Fig 4L	#Fos cells	one-way ANOVA	18		between groups	P=0.9302		F (2, 15) = 0.07269
				Tukey's multiple comparisons test	Sal vs. NLXM	0.9313
					Sal vs. NLX	0.9557
					NLXM vs. NLX	0.9989
Fig 4M	%TH cells expressing Fos-IR	one-way ANOVA	18		between groups	P=0.0482		F (2, 15) = 3.736
				Tukey's multiple comparisons test	Sal vs. NLXM	0.0953
					Sal vs. NLX	0.0642
					NLXM vs. NLX	0.9107
