# Supplementary material for: Peripheral opioid receptor antagonism alleviates fentanyl-induced cardiorespiratory depression and is devoid of aversive behavior
Source: eLife. 2025 Apr 1;13:RP104469. doi: 10.7554/eLife.104469 (PMC11961120; doi:10.7554/eLife.104469)
Supplement: Figure 5—source data 1. [file elife-104469-fig5-data1.xlsx]

## Sheet: Fig 5 Data Stats
Panel	Data Analyzed	Primary Analysis	n	Post-Hoc Analysis	Comparison	P value	Statistic (DF)
Fig 5C	Time Spent Paired Chamber, pretest vs posttest; Fentanyl pretreat	Two-way RM ANOVA	27		Treatment vs Pre/Post	P=0.0002		F (3, 23) = 9.994
					Treatment	P=0.4594		F (3, 23) = 0.8936		Statistical Source Data for Figure 5
					Pre/Post	P=0.6646		F (1, 23) = 0.1929
					Subject	P=0.0017		F (23, 23) = 3.565
				Sidak's multiple comparisons test	Pre/Post Saline	0.6865
					Pre/Post NLX	0.0007
					Pre/Post 1 mg/kg NLXM	0.2566
					Pre/Post 5 mg/kg NLXM	0.1357
					Pretest Saline vs. NLX	0.457
					Pretest Saline vs. 1 mg NLXM	>0.9999
					Pretest Saline vs. 5 mg NLXM	0.9582
					Pretest NLX vs. 1 mg NLXM	0.4461
					Pretest NLX vs. 5 mg NLXM	0.9389
					Pretest 1 mg NLXM vs. 5 mg NLXM	0.9627
					Posttest Saline vs. NLX	0.2875
					Posttest Saline vs. 1 mg NLXM	0.9984
					Posttest Saline vs. 5 mg NLXM	0.6399
					Posttest NLX vs. 1 mg NLXM	0.0895
					Posttest NLX vs. 5 mg NLXM	0.0054
					Posttest 1mg NLXM vs. 5 mg NLXM	0.8881
Fig 5D	CPA Score, fentanyl pretreat	One Sample T-Test, Theoretical mean=0	7		Fent +1 mg/kg NLX	0.0108		T(6)=3.642
			7		Fent + 1 mg/kg NLXM	0.0578		T(6)=2.340
			6		Fent + 5 mg/kg NLXM	0.0729		T(5)=0.5677
			7		Fent + 1ml/kg Saline	0.5677		T(6)=2.172
Fig 5G	Time Spent Paired Chamber, pretest vs posttest; Saline pretreat	Two-way RM ANOVA	13		Treatment vs Pre/Post	P=0.5099		F (1, 11) = 0.4638
					Treatment	P=0.5778		F (1, 11) = 0.3290
					Pre/Post	P=0.4944		F (1, 11) = 0.4996
					Subject	P=0.1950		F (11, 11) = 1.705
				Sidak's multiple comparisons test	Pre/Post NLX	0.5963
					Pre/Post 1 mg/kg NLXM	0.9998
					Pre NLX vs.1 mg NLXM	0.9989
					Post NLX vs. 1 mg NLXM	0.6327
Fig 5H	CPA Score, saline pretreat	One Sample T-Test, Theoretical mean=0	6		Saline +NLX	0.9461		T(5)=0.07102
			7		Saline +NLXM	0.9961		T(6)=0.005032
