# Supplementary material for: Peripheral opioid receptor antagonism alleviates fentanyl-induced cardiorespiratory depression and is devoid of aversive behavior
Source: eLife. 2025 Apr 1;13:RP104469. doi: 10.7554/eLife.104469 (PMC11961120; doi:10.7554/eLife.104469)
Supplement: Figure 6—source data 1. [file elife-104469-fig6-data1.xlsx]

## Sheet: Figure 6
Panel	Data Analyzed	Primary Analysis	n	Post-Hoc Analysis	Comparison	P value	Statistic (DF)
Fig 6F	Peak AUC Pretreat	One Sample T-Test, Theoretical mean=0	5		Fent -30 to 0s	0.5663		T(4)=0.6243		Statistical Source Data for Figure 6
			5		Fent 0 to 30s	0.0025		T(4)=6.747
			5		Fent 30 to 60s	0.0001		T(4)=14.35
			7		NLXM -30 to 0s	0.7804		T(6)=0.2916
			7		NLXM 0 to 30s	0.1288		T(6)=0.1288
			7		NLXM 30 to 60s	0.3548		T(6)=1.002
Fig 6G	Peak AUC Reversal	One Sample T-Test, Theoretical mean=0	3		NLXM -30 to 0s	0.0408		T(2)=4.799
			3		NLXM 0 to 30s	0.0217		T(2)=6.683
			3		NLXM 30 to 60s	0.0215		T(2)=6.716
			5		NLX -30 to 0s	0.0046		T(4)=5.721
			5		NLX 0 to 30s	0.9907		T(4)=0.01238
			5		NLX 30 to 60s	0.0294		T(4)=3.318
