# Supplementary material for: Peripheral opioid receptor antagonism alleviates fentanyl-induced cardiorespiratory depression and is devoid of aversive behavior
Source: eLife. 2025 Apr 1;13:RP104469. doi: 10.7554/eLife.104469 (PMC11961120; doi:10.7554/eLife.104469)
Supplement: Source data 1. [file elife-104469-data1.xlsx]

## Sheet: Supplementary File 1A
Panel	Data Analyzed	Primary Analysis	n	Post-Hoc Analysis	Comparison	P value	Statistic (DF)
Supplementary File 1A	Baseline O2 saturation 20 ug/kg Groups	one-way ANOVA	33		between groups	P=0.6434		F (5, 27) = 0.6787
				Tukey's multiple comparisons test	F1 Males vs. F1 Females	0.9998
					F1 Males vs. F4 Males	0.934
					F1 Males vs. F4 Females	>0.9999
					F1 Males vs. F3 Males	0.9478
					F1 Males vs. F3 Females	0.9688
					F1 Females vs. F4 Males	0.9843
					F1 Females vs. F4 Females	0.9999
					F1 Females vs. F3 Males	0.9038
					F1 Females vs. F3 Females	0.9353
					F4 Males vs. F4 Females	0.9518
					F4 Males vs. F3 Males	0.6243
					F4 Males vs. F3 Females	0.6937
					F4 Females vs. F3 Males	0.9738
					F4 Females vs. F3 Females	0.9838
					F3 Males vs. F3 Females	>0.9999
Supplementary File 1A	Baseline Heart Rate 20 ug/kg Groups	one-way ANOVA	33		between groups	P=0.3944		F (5, 27) = 1.078
				Tukey's multiple comparisons test	F1 Males vs. F1 Females	0.9068
					F1 Males vs. F4 Males	0.9983
					F1 Males vs. F4 Females	0.6701
					F1 Males vs. F3 Males	0.9518
					F1 Males vs. F3 Females	0.9996
					F1 Females vs. F4 Males	0.9974
					F1 Females vs. F4 Females	0.9962
					F1 Females vs. F3 Males	0.5529
					F1 Females vs. F3 Females	0.993
					F4 Males vs. F4 Females	0.949
					F4 Males vs. F3 Males	0.8828
					F4 Males vs. F3 Females	>0.9999
					F4 Females vs. F3 Males	0.3265
					F4 Females vs. F3 Females	0.9215
					F3 Males vs. F3 Females	0.9186
Supplementary File 1A	Baseline Respiratory Rate 20 ug/kg Groups	one-way ANOVA	33		between groups	P=0.2147		F (5, 27) = 1.527
				Tukey's multiple comparisons test	F1 Males vs. F1 Females	0.3179
					F1 Males vs. F4 Males	0.964
					F1 Males vs. F4 Females	0.8865
					F1 Males vs. F3 Males	>0.9999
					F1 Males vs. F3 Females	0.9824
					F1 Females vs. F4 Males	0.9255
					F1 Females vs. F4 Females	0.9582
					F1 Females vs. F3 Males	0.5117
					F1 Females vs. F3 Females	0.2101
					F4 Males vs. F4 Females	>0.9999
					F4 Males vs. F3 Males	0.9854
					F4 Males vs. F3 Females	0.8009
					F4 Females vs. F3 Males	0.9486
					F4 Females vs. F3 Females	0.6632
					F3 Males vs. F3 Females	0.9828

## Sheet: Supplementary File 1B
Panel	Data Analyzed	Primary Analysis	n	Post-Hoc Analysis	Comparison	P value	Statistic (DF)
Supplementary File 1B	Baseline O2 saturation 50 ug/kg Groups	one-way ANOVA	31		between groups	P=0.3558		F (5, 25) = 1.161
				Tukey's multiple comparisons test	F1 Males vs. F1 Females	0.9448
					F1 Males vs. S2 Males	0.9837
					F1 Males vs. S2 Females	0.8652
					F1 Males vs. S1 Males	0.9971
					F1 Males vs. S1 Females	0.8478
					F1 Females vs. S2 Males	0.6866
					F1 Females vs. S2 Females	0.9994
					F1 Females vs. S1 Males	0.8007
					F1 Females vs. S1 Females	0.999
					S2 Males vs. S2 Females	0.582
					S2 Males vs. S1 Males	>0.9999
					S2 Males vs. S1 Females	0.5592
					S2 Females vs. S1 Males	0.6941
					S2 Females vs. S1 Females	>0.9999
					S1 Males vs. S1 Females	0.672
Supplementary File 1B	Baseline Heart Rate 50 ug/kg Groups	one-way ANOVA	31		between groups	P=0.0110		F (5, 25) = 3.774
				Tukey's multiple comparisons test	F1 Males vs. F1 Females	0.0055
					F1 Males vs. S2 Males	0.9863
					F1 Males vs. S2 Females	0.3548
					F1 Males vs. S1 Males	0.325
					F1 Males vs. S1 Females	0.8213
					F1 Females vs. S2 Males	0.0505
					F1 Females vs. S2 Females	0.667
					F1 Females vs. S1 Males	0.5562
					F1 Females vs. S1 Females	0.238
					S2 Males vs. S2 Females	0.7641
					S2 Males vs. S1 Males	0.7623
					S2 Males vs. S1 Females	0.9914
					S2 Females vs. S1 Males	>0.9999
					S2 Females vs. S1 Females	0.9784
					S1 Males vs. S1 Females	0.9826
Supplementary File 1B	Baseline Respiratory Rate 50 ug/kg Groups	one-way ANOVA	31		between groups	P=0.1649		F (5, 25) = 1.728
				Tukey's multiple comparisons test	F1 Males vs. F1 Females	0.1098
					F1 Males vs. S2 Males	0.9857
					F1 Males vs. S2 Females	0.5735
					F1 Males vs. S1 Males	0.9024
					F1 Males vs. S1 Females	0.9924
					F1 Females vs. S2 Males	0.4512
					F1 Females vs. S2 Females	0.9768
					F1 Females vs. S1 Males	0.6759
					F1 Females vs. S1 Females	0.4946
					S2 Males vs. S2 Females	0.9213
					S2 Males vs. S1 Males	0.9992
					S2 Males vs. S1 Females	>0.9999
					S2 Females vs. S1 Males	0.9864
					S2 Females vs. S1 Females	0.925
					S1 Males vs. S1 Females	0.9989

## Sheet: Supplementary File 1C
Panel	Data Analyzed	Primary Analysis	n	Post-Hoc Analysis	Comparison	P value	Statistic (DF)
Supplementary File 1C	O2 saturation Nadir 20 ug/kg Groups	one-way ANOVA	33		between groups	P=0.3230		F (5, 27) = 1.229
				Tukey's multiple comparisons test	F1 Males vs. F1 Females	>0.9999
					F1 Males vs. F4 Males	0.9905
					F1 Males vs. F4 Females	0.9787
					F1 Males vs. F3 Males	0.8283
					F1 Males vs. F3 Females	0.5085
					F1 Females vs. F4 Males	0.996
					F1 Females vs. F4 Females	0.9778
					F1 Females vs. F3 Males	0.8435
					F1 Females vs. F3 Females	0.5467
					F4 Males vs. F4 Females	0.8663
					F4 Males vs. F3 Males	0.6433
					F4 Males vs. F3 Females	0.369
					F4 Females vs. F3 Males	0.9977
					F4 Females vs. F3 Females	0.9201
					F3 Males vs. F3 Females	0.9923
Supplementary File 1C	Heart Rate Nadir 20 ug/kg Groups	one-way ANOVA	33		between groups	P=0.1379		F (5, 27) = 1.844
				Tukey's multiple comparisons test	F1 Males vs. F1 Females	0.9071
					F1 Males vs. F4 Males	0.9097
					F1 Males vs. F4 Females	0.9417
					F1 Males vs. F3 Males	0.5135
					F1 Males vs. F3 Females	>0.9999
					F1 Females vs. F4 Males	0.4972
					F1 Females vs. F4 Females	>0.9999
					F1 Females vs. F3 Males	0.1599
					F1 Females vs. F3 Females	0.9777
					F4 Males vs. F4 Females	0.5683
					F4 Males vs. F3 Males	0.9935
					F4 Males vs. F3 Females	0.9257
					F4 Females vs. F3 Males	0.213
					F4 Females vs. F3 Females	0.9863
					F3 Males vs. F3 Females	0.6292
Supplementary File 1C	Respiratory Rate Nadir 20 ug/kg Groups	one-way ANOVA	33		between groups	P=0.0438		F (5, 27) = 2.669
				Tukey's multiple comparisons test	F1 Males vs. F1 Females	0.6402
					F1 Males vs. F4 Males	0.8994
					F1 Males vs. F4 Females	>0.9999
					F1 Males vs. F3 Males	0.7891
					F1 Males vs. F3 Females	0.3984
					F1 Females vs. F4 Males	0.2571
					F1 Females vs. F4 Females	0.674
					F1 Females vs. F3 Males	0.1508
					F1 Females vs. F3 Females	0.9934
					F4 Males vs. F4 Females	0.9646
					F4 Males vs. F3 Males	>0.9999
					F4 Males vs. F3 Females	0.1484
					F4 Females vs. F3 Males	0.9149
					F4 Females vs. F3 Females	0.4393
					F3 Males vs. F3 Females	0.0858
Table 3	O2 saturation Recovery 20 ug/kg Groups	one-way ANOVA	33		between groups	P=0.6267		F (5, 27) = 0.7021
				Tukey's multiple comparisons test	F1 Males vs. F1 Females	0.9944
					F1 Males vs. F4 Males	0.8719
					F1 Males vs. F4 Females	>0.9999
					F1 Males vs. F3 Males	0.9998
					F1 Males vs. F3 Females	0.8719
					F1 Females vs. F4 Males	0.6863
					F1 Females vs. F4 Females	0.994
					F1 Females vs. F3 Males	0.9786
					F1 Females vs. F3 Females	0.6863
					F4 Males vs. F4 Females	0.9361
					F4 Males vs. F3 Males	0.9705
					F4 Males vs. F3 Females	>0.9999
					F4 Females vs. F3 Males	>0.9999
					F4 Females vs. F3 Females	0.9361
					F3 Males vs. F3 Females	0.9705
Table 3	Heart Rate Recovery 20 ug/kg Groups	one-way ANOVA	33		between groups	P=0.8069		F (5, 27) = 0.4536
				Tukey's multiple comparisons test	F1 Males vs. F1 Females	0.9992
					F1 Males vs. F4 Males	>0.9999
					F1 Males vs. F4 Females	0.9448
					F1 Males vs. F3 Males	0.9999
					F1 Males vs. F3 Females	0.977
					F1 Females vs. F4 Males	0.9995
					F1 Females vs. F4 Females	0.9952
					F1 Females vs. F3 Males	0.9942
					F1 Females vs. F3 Females	0.925
					F4 Males vs. F4 Females	0.9709
					F4 Males vs. F3 Males	>0.9999
					F4 Males vs. F3 Females	0.9905
					F4 Females vs. F3 Males	0.9124
					F4 Females vs. F3 Females	0.7308
					F3 Males vs. F3 Females	0.9975
Table 3	Respiratory Rate Recovery 20 ug/kg Groups	one-way ANOVA	33		between groups	P=0.3832		F (5, 27) = 1.100
				Tukey's multiple comparisons test	F1 Males vs. F1 Females	0.9879
					F1 Males vs. F4 Males	0.9979
					F1 Males vs. F4 Females	0.9009
					F1 Males vs. F3 Males	0.9877
					F1 Males vs. F3 Females	0.6641
					F1 Females vs. F4 Males	0.9398
					F1 Females vs. F4 Females	0.9983
					F1 Females vs. F3 Males	0.866
					F1 Females vs. F3 Females	0.946
					F4 Males vs. F4 Females	0.8094
					F4 Males vs. F3 Males	>0.9999
					F4 Males vs. F3 Females	0.5779
					F4 Females vs. F3 Males	0.6848
					F4 Females vs. F3 Females	0.9963
					F3 Males vs. F3 Females	0.4397

## Sheet: Supplementary File 1D
Panel	Data Analyzed	Primary Analysis	n	Post-Hoc Analysis	Comparison	P value	Statistic (DF)
Supplementary File 1D	O2 saturation Nadir 50 ug/kg Groups	one-way ANOVA	31		between groups	P=0.2639		F (5, 25) = 1.384
				Tukey's multiple comparisons test	F1 Males vs. F1 Females	0.6661
					F1 Males vs. S2 Males	0.3593
					F1 Males vs. S2 Females	0.6967
					F1 Males vs. S1 Males	0.2306
					F1 Males vs. S1 Females	0.9371
					F1 Females vs. S2 Males	0.9919
					F1 Females vs. S2 Females	>0.9999
					F1 Females vs. S1 Males	0.9557
					F1 Females vs. S1 Females	0.9985
					S2 Males vs. S2 Females	0.9984
					S2 Males vs. S1 Males	0.9998
					S2 Males vs. S1 Females	0.9422
					S2 Females vs. S1 Males	0.9854
					S2 Females vs. S1 Females	0.9968
					S1 Males vs. S1 Females	0.8566
Supplementary File 1D	Heart Rate Nadir 50 ug/kg Groups	one-way ANOVA	31		between groups	P=0.5039		F (5, 25) = 0.8879
				Tukey's multiple comparisons test	F1 Males vs. F1 Females	0.8045
					F1 Males vs. S2 Males	0.6584
					F1 Males vs. S2 Females	0.9999
					F1 Males vs. S1 Males	0.9751
					F1 Males vs. S1 Females	>0.9999
					F1 Females vs. S2 Males	0.9996
					F1 Females vs. S2 Females	0.7755
					F1 Females vs. S1 Males	0.9976
					F1 Females vs. S1 Females	0.9048
					S2 Males vs. S2 Females	0.6416
					S2 Males vs. S1 Males	0.9777
					S2 Males vs. S1 Females	0.7998
					S2 Females vs. S1 Males	0.9516
					S2 Females vs. S1 Females	0.9998
					S1 Males vs. S1 Females	0.9909
Supplementary File 1D	Respiratory Rate Nadir 50 ug/kg Groups	one-way ANOVA	31		between groups	P=0.3591		F (5, 25) = 1.154
				Tukey's multiple comparisons test	F1 Males vs. F1 Females	0.9452
					F1 Males vs. S2 Males	>0.9999
					F1 Males vs. S2 Females	0.8256
					F1 Males vs. S1 Males	0.9717
					F1 Males vs. S1 Females	0.8686
					F1 Females vs. S2 Males	0.9017
					F1 Females vs. S2 Females	0.3988
					F1 Females vs. S1 Males	0.6347
					F1 Females vs. S1 Females	0.4512
					S2 Males vs. S2 Females	0.9321
					S2 Males vs. S1 Males	0.9958
					S2 Males vs. S1 Females	0.9545
					S2 Females vs. S1 Males	0.9968
					S2 Females vs. S1 Females	>0.9999
					S1 Males vs. S1 Females	0.9988
Table 4	O2 saturation Recovery 50 ug/kg Groups	one-way ANOVA	31		between groups	P=0.9469		F (5, 25) = 0.2277
				Tukey's multiple comparisons test	F1 Males vs. F1 Females	0.9965
					F1 Males vs. S2 Males	0.9993
					F1 Males vs. S2 Females	0.9987
					F1 Males vs. S1 Males	>0.9999
					F1 Males vs. S1 Females	0.9005
					F1 Females vs. S2 Males	>0.9999
					F1 Females vs. S2 Females	>0.9999
					F1 Females vs. S1 Males	>0.9999
					F1 Females vs. S1 Females	0.9905
					S2 Males vs. S2 Females	>0.9999
					S2 Males vs. S1 Males	>0.9999
					S2 Males vs. S1 Females	0.9836
					S2 Females vs. S1 Males	>0.9999
					S2 Females vs. S1 Females	0.9917
					S1 Males vs. S1 Females	0.969
Table 4	Heart Rate Recovery 50 ug/kg Groups	one-way ANOVA	31		between groups	P=0.1992		F (5, 25) = 1.591
				Tukey's multiple comparisons test	F1 Males vs. F1 Females	0.1411
					F1 Males vs. S2 Males	0.8396
					F1 Males vs. S2 Females	0.5865
					F1 Males vs. S1 Males	0.3779
					F1 Males vs. S1 Females	0.9298
					F1 Females vs. S2 Males	0.8235
					F1 Females vs. S2 Females	0.9872
					F1 Females vs. S1 Males	0.9975
					F1 Females vs. S1 Females	0.783
					S2 Males vs. S2 Females	0.9961
					S2 Males vs. S1 Males	0.9747
					S2 Males vs. S1 Females	>0.9999
					S2 Females vs. S1 Males	>0.9999
					S2 Females vs. S1 Females	0.9896
					S1 Males vs. S1 Females	0.9552
Table 4	Respiratory Rate Recovery 50 ug/kg Groups	one-way ANOVA	31		between groups	P=0.0061		F (5, 25) = 4.258
				Tukey's multiple comparisons test	F1 Males vs. F1 Females	0.0203
					F1 Males vs. S2 Males	0.9994
					F1 Males vs. S2 Females	0.1395
					F1 Males vs. S1 Males	0.8754
					F1 Males vs. S1 Females	>0.9999
					F1 Females vs. S2 Males	0.0188
					F1 Females vs. S2 Females	0.9959
					F1 Females vs. S1 Males	0.3042
					F1 Females vs. S1 Females	0.0876
					S2 Males vs. S2 Females	0.1112
					S2 Males vs. S1 Males	0.7689
					S2 Males vs. S1 Females	0.997
					S2 Females vs. S1 Males	0.6984
					S2 Females vs. S1 Females	0.3098
					S1 Males vs. S1 Females	0.9674
